# Supplementary material for: An 18S rRNA Workflow for Characterizing Protists in Sewage, with a Focus on Zoonotic Trichomonads
Source: PubMed Central journal article supplement (PMC5653731; doi:10.1007/s00248-017-0996-9), 2017-05-24
Supplement: 248_2017_996_MOESM1_ESM.pdf [file 248_2017_996_MOESM1_ESM.pdf]

An 18S rRNA workflow for characterizing protists in sewage, with a focus on zoonotic trichomonads; Microbial Ecology; Maritz, JM, Rogers, KH, Rock, TM, Liu N, Joseph, S. Land, KM, Carlton, JM\*;  
\*corresponding author, Center for Genomics and Systems Biology, Department of Biology, New York University, jane.carlton@nyu.edu

**Online Resource 1** details of the DNA sources used in this study. Gives strain/isolate name, provider, geographical location and source (where known).  
References are provided for published isolates/strains not available through ATCC or other sources.

| Genus and species                  | Strain or isolate      | Provider      | Geographical location (where known) | Source (where known)            | Reference   |
|------------------------------------|------------------------|---------------|-------------------------------------|---------------------------------|-------------|
| <i>Trichomonas vaginalis</i>       | G3                     | ATCC #PRA-98  | Kent, England                       | Human                           |             |
| <i>Trichomonas vaginalis</i>       | C1:NIH                 | ATCC #30001   | Maryland, USA                       | Human female                    |             |
| <i>Trichomonas vaginalis</i>       | TAIHS/03/HEPU/192      | Carlton Lab   | Northern Queensland, Australia      | Human                           | 1           |
| <i>Trichomonas vaginalis</i>       | TAIHS/03/HEPU/176      | Carlton Lab   | Northern Queensland, Australia      | Human                           | 1           |
| <i>Trichomonas vaginalis</i>       | DUR/03/FMUN/A19        | Carlton Lab   | Rural Kwazulu-Natal, SA             | Human                           | 1           |
| <i>Trichomonas vaginalis</i>       | DUR/03/FMUN/A71        | Carlton Lab   | Rural Kwazulu-Natal, SA             | Human                           | 1           |
| <i>Trichomonas vaginalis</i>       | DUR/03/FMUN/30         | Carlton Lab   | Rural Kwazulu-Natal, SA             | Human                           | 1           |
| <i>Trichomonas vaginalis</i>       | GOR/03/PNGIMR/23       | Carlton Lab   | Goroka, PPNG                        | Human                           | 1           |
| <i>Trichomonas vaginalis</i>       | GOR/03/PNGIMR/21       | Carlton Lab   | Goroka, PPNG                        | Human                           | 1           |
| <i>Trichomonas vaginalis</i>       | PMGH25                 | Carlton Lab   | Port Moresby, PNG                   | Human                           | 1           |
| <i>Trichomonas vaginalis</i>       | NYCF20                 | Carlton Lab   | New York, NY                        | Human                           | 1           |
| <i>Trichomonas vaginalis</i>       | NYCE32                 | Carlton Lab   | Brooklyn, NY                        | Human                           | 1           |
| <i>Trichomonas vaginalis</i>       | NYCC37                 | Carlton Lab   | New York, NY                        | Human                           | 1           |
| <i>Trichomonas vaginalis</i>       | NYCB20                 | Carlton Lab   | Brooklyn, NY                        | Human                           | 1           |
| <i>Trichomonas vaginalis</i>       | NYCD15                 | Carlton Lab   | New York, NY                        | Human                           | 1           |
| <i>Trichomonas vaginalis</i>       | NYCA04                 | Carlton Lab   | Brooklyn, NY                        | Human                           | 1           |
| <i>Trichomonas vaginalis</i>       | SD1                    | Carlton Lab   | San Diego, CA                       | Human                           | 1           |
| <i>Trichomonas vaginalis</i>       | SD7                    | Carlton Lab   | San Diego, CA                       | Human                           | 1           |
| <i>Trichomonas vaginalis</i>       | 1080                   | Carlton Lab   | New York, NY                        | Human                           | 1           |
| <i>Trichomonas vaginalis</i>       | 1035                   | Carlton Lab   | Brooklyn, NY                        | Human                           | 1           |
| <i>Trichomonas vaginalis</i>       | 1031                   | Carlton Lab   | New Lenox, IL                       | Human                           | 1           |
| <i>Trichomonas vaginalis</i>       | CDC252                 | Carlton Lab   | San Diego, CA                       | Human                           | 1           |
| <i>Trichomonas vaginalis</i>       | CNDC188                | Carlton Lab   | Mexico City, Mexico                 | Human                           | 1           |
| <i>Trichomonas vaginalis</i>       | CNDC217                | Carlton Lab   | Mexico City, Mexico                 | Human                           | 1           |
| <i>Trichomonas vaginalis-like</i>  | 12839                  | Kirkwood Land | California, USA                     | Band-tailed pigeon              | Unpublished |
| <i>Trichomonas vaginalis-like</i>  | 12840                  | Kirkwood Land | California, USA                     | Band-tailed pigeon              | Unpublished |
| <i>Trichomonas vaginalis-like</i>  | 12842                  | Kirkwood Land | California, USA                     | Band-tailed pigeon              | Unpublished |
| <i>Trichomonas vaginalis-like</i>  | 12847                  | Kirkwood Land | California, USA                     | Band-tailed pigeon              | Unpublished |
| <i>Trichomonas vaginalis-like</i>  | 12850                  | Kirkwood Land | California, USA                     | Band-tailed pigeon              | Unpublished |
| <i>Trichomonas vaginalis-like</i>  | 12855                  | Kirkwood Land | California, USA                     | Band-tailed pigeon              | Unpublished |
| <i>Trichomonas vaginalis-like</i>  | 12857                  | Kirkwood Land | California, USA                     | Band-tailed pigeon              | Unpublished |
| <i>Trichomonas vaginalis-like</i>  | 13207                  | Kirkwood Land | California, USA                     | Eurasian collared dove          | Unpublished |
| <i>Trichomonas vaginalis-like</i>  | 13211                  | Kirkwood Land | California, USA                     | Eurasian collared dove          | Unpublished |
| <i>Trichomonas vaginalis-like</i>  | 13240                  | Kirkwood Land | California, USA                     | Eurasian collared dove          | Unpublished |
| <i>Trichomonas vaginalis-like</i>  | 13255                  | Kirkwood Land | California, USA                     | Eurasian collared dove          | Unpublished |
| <i>Trichomonas gallinae</i>        | SL substrain of DP3    | ATCC #30096   | Washington DC, USA                  | Pigeon ( <i>Columba livia</i> ) |             |
| <i>Trichomonas gallinae</i>        | DP3 of Jones Barn (JB) | ATCC #30095   | Pensylvania, USA                    | Wild squab                      |             |
| <i>Trichomonas gallinae</i>        | AG (Amherst)           | ATCC #30002   | Masachusettes, USA                  | Pigeon ( <i>Columba livia</i> ) |             |
| <i>Trichomonas gallinae</i>        | TG                     | ATCC #30230   | Not provided                        | Pigeon ( <i>Columba sp.</i> )   |             |
| <i>Trichomonas tenax</i>           | Hs-4:NIH               | ATCC #30207   | Not provided                        | Human female                    |             |
| <i>Tetratrichomonas gallinarum</i> | Leverett               | ATCC #30249   | Masachusettes, USA                  | Chicken ( <i>Gallus sp.</i> )   |             |
| <i>Tetratrichomonas gallinarum</i> | TP-79                  | ATCC #30097   | Maryland, USA                       | Domestic turkey                 |             |
| <i>Pentatrichomonas hominis</i>    | Hs-3:NIH               | ATCC #30000   | Korea                               | Human intestine                 |             |
| <i>Dientamoeba fragilis</i>        | Genotype 1             | Graham Clark  | Not provided                        | Human feces                     | 2           |
| <i>Tritrichomonas foetus</i>       | KV-1                   | ATCC #30924   | Czech Republic                      | <i>Bos taurus</i>               |             |
| <i>Trichomitus batrachorum</i>     | G43                    | ATCC #30068   | Bronx Zoo, NY USA                   | Snake ( <i>Vipera russell</i> ) |             |
| <i>Monocercomonas colubrorum</i>   | W-578-73               | ATCC #30226   | Ontario, Canada                     | <i>Iguana iguana</i>            |             |
| <i>Monotrichomonas carabina</i>    | QBSA-1                 | ATCC #50700   | Not provided                        | Free-living                     |             |
| <i>Ditrichomonas honigbergii</i>   | DR                     | ATCC #50322   | Dominican Republic                  | Free-living, lake sediment      |             |
| <i>Cryptosporidium parvum</i>      | Iowa                   | ATCC #PRA-67D | Not provided                        | Animal feces                    |             |
| <i>Toxoplasma gondii</i>           | RH                     | ATCC #50174D  | Ohio, USA                           | Human male                      |             |

|                                 |              |                       |                     |                                   |  |
|---------------------------------|--------------|-----------------------|---------------------|-----------------------------------|--|
| <i>Blastocystis hominis</i>     | BT1          | ATCC #50608D          | Not provided        | Human feces                       |  |
| <i>Giardia intestinalis</i>     | Portland-1   | ATCC #30888D          | Portland, USA       | Human female                      |  |
| <i>Entamoeba histolytica</i>    | HM-1:IMSS    | ATCC #30459           | Mexico City, Mexico | Human male                        |  |
| <i>Entamoeba invadens</i>       | IP-1         | ATCC #30994           | Florida, USA        | Snake ( <i>Natrix cyclopion</i> ) |  |
| <i>Saccharomyces cerevisiae</i> | SK1          | ATCC #204722          | Not provided        | <i>Saccharomyces cerevisiae</i>   |  |
| <i>Homo sapiens</i>             | NA           | Novagen 69237         | Not provided        | Human                             |  |
| <i>Rattus sp.</i>               | Not provided | BioChain D1434999-G02 | Not provided        | Female rat                        |  |
| <i>Gallus gallus</i>            | Not provided | BioChain D1C34999-G02 | Not provided        | Female chicken                    |  |
| <i>Canis lupus familiaris</i>   | Not provided | BioChain D1734999-G02 | Not provided        | Female dog                        |  |
| <i>Equus caballus</i>           | Not provided | BioChain D1O34999-G02 | Not provided        | Female horse                      |  |

## References

- Conrad MD, Gorman AW, Schillinger JA, Fiori PL, Arroyo R, Malla N, Dubey ML, Gonzalez J, Blank S, Secor WE et al:  
 Extensive Genetic Diversity, Unique Population Structure and Evidence of Genetic Exchange in the Sexually Transmitted Parasite *Trichomonas vaginalis*.  
 Plos Neglect Trop D 2012, 6(3).
- 1  
 2 Johnson JA & Clark CG: Cryptic diversity in *Dientamoeba fragilis*. J Clin Microbiol 2000, 38(12).
