# Supplementary material for: An 18S rRNA Workflow for Characterizing Protists in Sewage, with a Focus on Zoonotic Trichomonads
Source: PubMed Central journal article supplement (PMC5653731; doi:10.1007/s00248-017-0996-9), 2017-05-24
Supplement: 248_2017_996_MOESM5_ESM.pdf [file 248_2017_996_MOESM5_ESM.pdf]

An 18S rRNA workflow for characterizing protists in sewage, with a focus on zoonotic trichomonads;

Microbial Ecology;

Maritz, JM, Rogers, KH, Rock, TM, Liu N, Joseph, S. Land, KM, Carlton, JM\*;

\*corresponding author, Center for Genomics and Systems Biology, Department of Biology, New York University, jane.carlton@nyu.edu

**Online Resource 5** number and identity of Sanger sequences represented by each OTU clustered at 97% V4 region

| OTU number | Sequences included                                                                                                                                                                                                                                                                                                                                                                                                                                        |                                                                                                                                                                                                                                                                                                                                                                                                                                                                          |                                                                                                                                                                                                                                                                                                                                                                                                                                    |
|------------|-----------------------------------------------------------------------------------------------------------------------------------------------------------------------------------------------------------------------------------------------------------------------------------------------------------------------------------------------------------------------------------------------------------------------------------------------------------|--------------------------------------------------------------------------------------------------------------------------------------------------------------------------------------------------------------------------------------------------------------------------------------------------------------------------------------------------------------------------------------------------------------------------------------------------------------------------|------------------------------------------------------------------------------------------------------------------------------------------------------------------------------------------------------------------------------------------------------------------------------------------------------------------------------------------------------------------------------------------------------------------------------------|
| 1          | Trichomonas_vaginalis_THAIS192<br>Trichomonas_vaginalis_SD1<br>Trichomonas_vaginalis_SA30<br>Trichomonas_vaginalis_NYCE32<br>Trichomonas_vaginalis_NYCB20<br>Trichomonas_vaginalis-like_13240<br>Trichomonas_vaginalis-like_12857<br>Trichomonas_vaginalis-like_12847<br>Trichomonas_vaginalis-like_12839<br>Trichomonas_vaginalis_G3<br>Trichomonas_vaginalis_CDC252<br>Trichomonas_vaginalis_1035<br>Trichomonas_gallinae_TG<br>Trichomonas_gallinae_AG | Trichomonas_vaginalis_THAIS176<br>Trichomonas_vaginalis_SA-A71<br>Trichomonas_vaginalis_PMGH25<br>Trichomonas_vaginalis_NYCD15<br>Trichomonas_vaginalis_NYCA04<br>Trichomonas_vaginalis-like_13211<br>Trichomonas_vaginalis-like_12855<br>Trichomonas_vaginalis-like_12842<br>Trichomonas_vaginalis_GOR23<br>Trichomonas_vaginalis_CNDC217<br>Trichomonas_vaginalis_C1:NIH<br>Trichomonas_vaginalis_1031<br>Trichomonas_gallinae_SL<br>Tetratrichomonas_gallinarum_TP-79 | Trichomonas_vaginalis_SD7<br>Trichomonas_vaginalis_SA-A19<br>Trichomonas_vaginalis_NYCF20<br>Trichomonas_vaginalis_NYCC37<br>Trichomonas_vaginalis-like_13255<br>Trichomonas_vaginalis-like_13207<br>Trichomonas_vaginalis-like_12850<br>Trichomonas_vaginalis-like_12840<br>Trichomonas_vaginalis_GOR21<br>Trichomonas_vaginalis_CNDC188<br>Trichomonas_vaginalis_1080_<br>Trichomonas_tenax_Hs-4:NIH<br>Trichomonas_gallinae_DP3 |
| 2          | Rattus_sp.<br>Canis_lupus_familiaris                                                                                                                                                                                                                                                                                                                                                                                                                      | Homo_sapiens                                                                                                                                                                                                                                                                                                                                                                                                                                                             | Equus_caballus                                                                                                                                                                                                                                                                                                                                                                                                                     |
| 3          | Monotrichomonas_carabina_QBSA-1                                                                                                                                                                                                                                                                                                                                                                                                                           |                                                                                                                                                                                                                                                                                                                                                                                                                                                                          |                                                                                                                                                                                                                                                                                                                                                                                                                                    |
| 4          | Pentatrichomonas_hominis_Hs-3:NIH                                                                                                                                                                                                                                                                                                                                                                                                                         |                                                                                                                                                                                                                                                                                                                                                                                                                                                                          |                                                                                                                                                                                                                                                                                                                                                                                                                                    |
| 5          | Tetratrichomonas_gallinarum_Leverett                                                                                                                                                                                                                                                                                                                                                                                                                      |                                                                                                                                                                                                                                                                                                                                                                                                                                                                          |                                                                                                                                                                                                                                                                                                                                                                                                                                    |
| 6          | Saccharomyces_cerevisiae_SK1                                                                                                                                                                                                                                                                                                                                                                                                                              |                                                                                                                                                                                                                                                                                                                                                                                                                                                                          |                                                                                                                                                                                                                                                                                                                                                                                                                                    |
| 7          | Ditrichomonas_honigbergii_DR                                                                                                                                                                                                                                                                                                                                                                                                                              |                                                                                                                                                                                                                                                                                                                                                                                                                                                                          |                                                                                                                                                                                                                                                                                                                                                                                                                                    |
| 8          | Cryptosporidium_parvum_lowa                                                                                                                                                                                                                                                                                                                                                                                                                               |                                                                                                                                                                                                                                                                                                                                                                                                                                                                          |                                                                                                                                                                                                                                                                                                                                                                                                                                    |
| 9          | Blastocystis_hominis_BT1                                                                                                                                                                                                                                                                                                                                                                                                                                  |                                                                                                                                                                                                                                                                                                                                                                                                                                                                          |                                                                                                                                                                                                                                                                                                                                                                                                                                    |
| 10         | Monocercomonas_colubrorum_W-578-73                                                                                                                                                                                                                                                                                                                                                                                                                        |                                                                                                                                                                                                                                                                                                                                                                                                                                                                          |                                                                                                                                                                                                                                                                                                                                                                                                                                    |
| 11         | Entamoeba_invadens_IP-1                                                                                                                                                                                                                                                                                                                                                                                                                                   | AF149905_Entamoeba_invadens                                                                                                                                                                                                                                                                                                                                                                                                                                              |                                                                                                                                                                                                                                                                                                                                                                                                                                    |
| 12         | Entamoeba_histolytica_HM-1:IMSS                                                                                                                                                                                                                                                                                                                                                                                                                           |                                                                                                                                                                                                                                                                                                                                                                                                                                                                          |                                                                                                                                                                                                                                                                                                                                                                                                                                    |
| 13         | M54878_Giardia_intestinalis_Portland-1                                                                                                                                                                                                                                                                                                                                                                                                                    |                                                                                                                                                                                                                                                                                                                                                                                                                                                                          |                                                                                                                                                                                                                                                                                                                                                                                                                                    |
| 14         | Trichomitus_batrachorum_G43                                                                                                                                                                                                                                                                                                                                                                                                                               |                                                                                                                                                                                                                                                                                                                                                                                                                                                                          |                                                                                                                                                                                                                                                                                                                                                                                                                                    |
| 15         | Toxoplasma_gondii_RH                                                                                                                                                                                                                                                                                                                                                                                                                                      |                                                                                                                                                                                                                                                                                                                                                                                                                                                                          |                                                                                                                                                                                                                                                                                                                                                                                                                                    |
| 16         | Gallus_gallus                                                                                                                                                                                                                                                                                                                                                                                                                                             |                                                                                                                                                                                                                                                                                                                                                                                                                                                                          |                                                                                                                                                                                                                                                                                                                                                                                                                                    |
| 17         | Tritrichomonas_foetus_KV-1                                                                                                                                                                                                                                                                                                                                                                                                                                |                                                                                                                                                                                                                                                                                                                                                                                                                                                                          |                                                                                                                                                                                                                                                                                                                                                                                                                                    |
| 18         | U37461_Dientamoeba_fragilis_Bi/PA                                                                                                                                                                                                                                                                                                                                                                                                                         |                                                                                                                                                                                                                                                                                                                                                                                                                                                                          |                                                                                                                                                                                                                                                                                                                                                                                                                                    |
| 19         | Dientamoeba_fragilis_Genotype1                                                                                                                                                                                                                                                                                                                                                                                                                            |                                                                                                                                                                                                                                                                                                                                                                                                                                                                          |                                                                                                                                                                                                                                                                                                                                                                                                                                    |

Online Resource 5 taxonomic assignment for the V4 Sanger sequences at 97%

| OTU number | Number of sequences assigned | Source of OTU representative sequence         | Taxonomy assigned, SILVA 111 db (evalue)    | Taxonomy assigned, curated db (evalue)      |
|------------|------------------------------|-----------------------------------------------|---------------------------------------------|---------------------------------------------|
| 1          | 41                           | <i>Trichomonas vaginalis</i> THAIS192         | <i>Trichomonas vaginalis</i> (9E-155)       | <i>Trichomonas vaginalis</i> (7E-156)       |
| 2          | 4                            | <i>Rattus</i> sp.                             | <i>Homo sapiens</i> (0)                     | <i>Homo sapiens</i> (0)                     |
| 3          | 1                            | <i>Monotrichomonas carabina</i> QBSA-1        | <i>Pseudotrichomonas</i> sp. (1E-95)        | <i>Monotrichomonas carabina</i> (5E-157)    |
| 4          | 1                            | <i>Pentatrichomonas hominis</i> Hs-3:NIH      | <i>Pentatrichomonas hominis</i> (1E-153)    | <i>Pentatrichomonas hominis</i> (1E-154)    |
| 5          | 1                            | <i>Tetratrichomonas gallinarum</i> Leverett   | <i>Tetratrichomonas gallinarum</i> (3E-142) | <i>Tetratrichomonas gallinarum</i> (3E-143) |
| 6          | 1                            | <i>Saccharomyces cerevisiae</i>               | <i>Saccharomyces cerevisiae</i> (0)         | <i>Saccharomyces cerevisiae</i> (0)         |
| 7          | 1                            | <i>Ditrichomonas honigbergii</i> DR           | <i>Honigbergiellidae</i> sp. (3E-117)       | <i>Ditrichomonas honigbergii</i> (1E-145)   |
| 8          | 1                            | <i>Cryptosporidium parvum</i> Iowa            | <i>Cryptosporidium parvum</i> (7E-122)      | <i>Cryptosporidium parvum</i> (6E-123)      |
| 9          | 1                            | <i>Blastocystis hominis</i> BT1               | <i>Blastocystis</i> sp. (0)                 | <i>Blastocystis</i> sp. (0)                 |
| 10         | 1                            | <i>Monocercomonas colubrorum</i> W-578-73     | <i>Monocercomonas colubrorum</i> (2E-130)   | <i>Monocercomonas colubrorum</i> (2E-131)   |
| 11         | 2                            | <i>Entamoeba invadens</i> IP-1                | No blast hit (None)                         | <i>Entamoeba invadens</i> (0)               |
| 12         | 1                            | <i>Entamoeba histolytica</i> HM-1:IMSS        | No blast hit (None)                         | <i>Entamoeba histolytica</i> (0)            |
| 13         | 1                            | M54878 <i>Giardia intestinalis</i> Portland-1 | <i>Giardia intestinalis</i> (2E-50)         | <i>Giardia intestinalis</i> (2E-51)         |
| 14         | 1                            | <i>Trichomitus batrachorum</i> G43            | <i>Trichomitus batrachorum</i> (5E-150)     | <i>Trichomitus batrachorum</i> (4E-151)     |
| 15         | 1                            | <i>Toxoplasma gondii</i> RH                   | <i>Toxoplasma gondii</i> (0)                | <i>Toxoplasma gondii</i> (0)                |
| 16         | 1                            | <i>Gallus gallus</i>                          | <i>Gallus gallus</i> (0)                    | <i>Gallus gallus</i> (0)                    |
| 17         | 1                            | <i>Tritrichomonas foetus</i> KV-1             | <i>Tritrichomonas suis</i> (1E-150)*        | <i>Tritrichomonas suis</i> (1E-151)         |
| 18         | 1                            | U37461 <i>Dientamoeba fragilis</i> Bi/PA      | <i>Dientamoeba fragilis</i> (6E-54)         | <i>Dientamoeba fragilis</i> (5E-55)         |
| 19         | 1                            | <i>Dientamoeba fragilis</i> Genotype1         | <i>Dientamoeba fragilis</i> (7E-57)         | <i>Dientamoeba fragilis</i> (6E-58)         |

\**Tritrichomonas foetus* and *Tritrichomonas suis* are considered the same species

**Online Resource 5** number and identity of Sanger sequences represented by each OTU clustered at 98% V4 region

| OTU number | Sequences included                                                                                                                                                                                                                                      |                                                                                                                                                                                                                                                          |                                                                                                                                                                                                                          |
|------------|---------------------------------------------------------------------------------------------------------------------------------------------------------------------------------------------------------------------------------------------------------|----------------------------------------------------------------------------------------------------------------------------------------------------------------------------------------------------------------------------------------------------------|--------------------------------------------------------------------------------------------------------------------------------------------------------------------------------------------------------------------------|
| 1          | Trichomonas_vaginalis_THAIS192<br>Trichomonas_vaginalis_SD1<br>Trichomonas_vaginalis_SA30<br>Trichomonas_vaginalis_NYCE32<br>Trichomonas_vaginalis_NYCB20<br>Trichomonas_vaginalis_GOR21<br>Trichomonas_vaginalis_CNDC188<br>Trichomonas_vaginalis_1035 | Trichomonas_vaginalis_THAIS176<br>Trichomonas_vaginalis_SA-A71<br>Trichomonas_vaginalis_PMGH25<br>Trichomonas_vaginalis_NYCD15<br>Trichomonas_vaginalis_NYCA04<br>Trichomonas_vaginalis_G3<br>Trichomonas_vaginalis_CDC252<br>Trichomonas_vaginalis_1031 | Trichomonas_vaginalis_SD7<br>Trichomonas_vaginalis_SA-A19<br>Trichomonas_vaginalis_NYCF20<br>Trichomonas_vaginalis_NYCC37<br>Trichomonas_vaginalis_GOR23<br>Trichomonas_vaginalis_CNDC217<br>Trichomonas_vaginalis_1080_ |
| 2          | Trichomonas_vaginalis-like_13255<br>Trichomonas_vaginalis-like_12857<br>Trichomonas_vaginalis-like_12850<br>Trichomonas_vaginalis-like_12840<br>Trichomonas_tenax_Hs-4:NIH<br>Trichomonas_gallinae_SL                                                   | Trichomonas_vaginalis-like_13240<br>Trichomonas_vaginalis-like_12855<br>Trichomonas_vaginalis-like_12847<br>Trichomonas_vaginalis-like_12839<br>Trichomonas_gallinae_TG<br>Trichomonas_gallinae_AG                                                       | Trichomonas_vaginalis-like_13211<br>Trichomonas_vaginalis-like_13207<br>Trichomonas_vaginalis-like_12842<br>Trichomonas_vaginalis_C1:NIH<br>Trichomonas_gallinae_DP3<br>Tetratrichomonas_gallinarum_TP-79                |
| 3          | Rattus_sp.<br>Canis_lupus_familiaris                                                                                                                                                                                                                    | Homo_sapiens                                                                                                                                                                                                                                             | Equus_caballus                                                                                                                                                                                                           |
| 4          | Monotrichomonas_carabina_QBSA-1                                                                                                                                                                                                                         |                                                                                                                                                                                                                                                          |                                                                                                                                                                                                                          |
| 5          | Pentatrichomonas_hominis_Hs-3:NIH                                                                                                                                                                                                                       |                                                                                                                                                                                                                                                          |                                                                                                                                                                                                                          |
| 6          | Tetratrichomonas_gallinarum_Leverett                                                                                                                                                                                                                    |                                                                                                                                                                                                                                                          |                                                                                                                                                                                                                          |
| 7          | Saccharomyces_cerevisiae_SK1                                                                                                                                                                                                                            |                                                                                                                                                                                                                                                          |                                                                                                                                                                                                                          |
| 8          | Ditrichomonas_honigbergii_DR                                                                                                                                                                                                                            |                                                                                                                                                                                                                                                          |                                                                                                                                                                                                                          |
| 9          | Cryptosporidium_parvum_lowa                                                                                                                                                                                                                             |                                                                                                                                                                                                                                                          |                                                                                                                                                                                                                          |
| 10         | Blastocystis_hominis_BT1                                                                                                                                                                                                                                |                                                                                                                                                                                                                                                          |                                                                                                                                                                                                                          |
| 11         | Monocercomonas_colubrorum_W-578-73                                                                                                                                                                                                                      |                                                                                                                                                                                                                                                          |                                                                                                                                                                                                                          |
| 12         | Entamoeba_invadens_IP-1                                                                                                                                                                                                                                 | AF149905_Entamoeba_invadens                                                                                                                                                                                                                              |                                                                                                                                                                                                                          |
| 13         | Entamoeba_histolytica_HM-1:IMSS                                                                                                                                                                                                                         |                                                                                                                                                                                                                                                          |                                                                                                                                                                                                                          |
| 14         | M54878_Giardia_intestinalis_Portland-1                                                                                                                                                                                                                  |                                                                                                                                                                                                                                                          |                                                                                                                                                                                                                          |
| 15         | Trichomitus_batrachorum_G43                                                                                                                                                                                                                             |                                                                                                                                                                                                                                                          |                                                                                                                                                                                                                          |
| 16         | Toxoplasma_gondii_RH                                                                                                                                                                                                                                    |                                                                                                                                                                                                                                                          |                                                                                                                                                                                                                          |
| 17         | Gallus_gallus                                                                                                                                                                                                                                           |                                                                                                                                                                                                                                                          |                                                                                                                                                                                                                          |
| 18         | Tritrichomonas_foetus_KV-1                                                                                                                                                                                                                              |                                                                                                                                                                                                                                                          |                                                                                                                                                                                                                          |
| 19         | U37461_Dientamoeba_fragilis_Bi/PA                                                                                                                                                                                                                       |                                                                                                                                                                                                                                                          |                                                                                                                                                                                                                          |
| 20         | Dientamoeba_fragilis_Genotype1                                                                                                                                                                                                                          |                                                                                                                                                                                                                                                          |                                                                                                                                                                                                                          |

Online Resource 5 taxonomic assignment for the V4 Sanger sequences at 98%

| OTU number | Number of sequences assigned | Source of OTU representative sequence         | Taxonomy assigned, SILVA 111 db (evalue)    | Taxonomy assigned, curated db (evalue)      |
|------------|------------------------------|-----------------------------------------------|---------------------------------------------|---------------------------------------------|
| 1          | 23                           | <i>Trichomonas vaginalis</i> THAIS192         | <i>Trichomonas vaginalis</i> (9E-155)       | <i>Trichomonas vaginalis</i> (7E-156)       |
| 2          | 18                           | Trichomonas vaginalis-like 13255              | <i>Trichomonas gallinae</i> (9E-155)        | <i>Trichomonas gallinae</i> (7E-156)        |
| 3          | 4                            | <i>Rattus sp.</i>                             | <i>Homo sapiens</i> (0)                     | <i>Homo sapiens</i> (0)                     |
| 4          | 1                            | <i>Monotrichomonas carabina</i> QBSA-1        | <i>Pseudotrichomonas sp.</i> (1E-95)        | <i>Monotrichomonas carabina</i> (5E-157)    |
| 5          | 1                            | <i>Pentatrichomonas hominis</i> Hs-3:NIH      | <i>Pentatrichomonas hominis</i> (1E-153)    | <i>Pentatrichomonas hominis</i> (1E-154)    |
| 6          | 1                            | <i>Tetratrichomonas gallinarum</i> Leverett   | <i>Tetratrichomonas gallinarum</i> (3E-142) | <i>Tetratrichomonas gallinarum</i> (3E-143) |
| 7          | 1                            | <i>Saccharomyces cerevisiae</i>               | <i>Saccharomyces cerevisiae</i> (0)         | <i>Saccharomyces cerevisiae</i> (0)         |
| 8          | 1                            | <i>Ditrichomonas honigbergii</i> DR           | <i>Honigbergiellidae sp.</i> (3E-117)       | <i>Ditrichomonas honigbergii</i> (1E-145)   |
| 9          | 1                            | <i>Cryptosporidium parvum</i> Iowa            | <i>Cryptosporidium parvum</i> (7E-122)      | <i>Cryptosporidium parvum</i> (6E-123)      |
| 10         | 1                            | <i>Blastocystis hominis</i> BT1               | <i>Blastocystis sp.</i> (0)                 | <i>Blastocystis sp.</i> (0)                 |
| 11         | 1                            | <i>Monocercomonas colubrorum</i> W-578-73     | <i>Monocercomonas colubrorum</i> (2E-130)   | <i>Monocercomonas colubrorum</i> (2E-131)   |
| 12         | 2                            | <i>Entamoeba invadens</i> IP-1                | No blast hit (None)                         | <i>Entamoeba invadens</i> (0)               |
| 13         | 1                            | <i>Entamoeba histolytica</i> HM-1:IMSS        | No blast hit (None)                         | <i>Entamoeba histolytica</i> (0)            |
| 14         | 1                            | M54878 <i>Giardia intestinalis</i> Portland-1 | <i>Giardia intestinalis</i> (2E-50)         | <i>Giardia intestinalis</i> (2E-51)         |
| 15         | 1                            | <i>Trichomitus batrachorum</i> G43            | <i>Trichomitus batrachorum</i> (5E-150)     | <i>Trichomitus batrachorum</i> (4E-151)     |
| 16         | 1                            | <i>Toxoplasma gondii</i> RH                   | <i>Toxoplasma gondii</i> (0)                | <i>Toxoplasma gondii</i> (0)                |
| 17         | 1                            | <i>Gallus gallus</i>                          | <i>Gallus gallus</i> (0)                    | <i>Gallus gallus</i> (0)                    |
| 18         | 1                            | <i>Tritrichomonas foetus</i> KV-1             | <i>Tritrichomonas suis</i> (1E-150)*        | <i>Tritrichomonas suis</i> (1E-151)*        |
| 19         | 1                            | U37461 <i>Dientamoeba fragilis</i> Bi/PA      | <i>Dientamoeba fragilis</i> (6E-54)         | <i>Dientamoeba fragilis</i> (5E-55)         |
| 20         | 1                            | <i>Dientamoeba fragilis</i> Genotype1         | <i>Dientamoeba fragilis</i> (7E-57)         | <i>Dientamoeba fragilis</i> (6E-58)         |

\**Tritrichomonas foetus* and *Tritrichomonas suis* are considered the same species
