# Supplementary material for: An 18S rRNA Workflow for Characterizing Protists in Sewage, with a Focus on Zoonotic Trichomonads
Source: PubMed Central journal article supplement (PMC5653731; doi:10.1007/s00248-017-0996-9), 2017-05-24
Supplement: 248_2017_996_MOESM6_ESM.pdf [file 248_2017_996_MOESM6_ESM.pdf]

An 18S rRNA workflow for characterizing protists in sewage, with a focus on zoonotic trichomonads;

Microbial Ecology;

Maritz, JM, Rogers, KH, Rock, TM, Liu N, Joseph, S. Land, KM, Carlton, JM\*;

\*corresponding author, Center for Genomics and Systems Biology, Department of Biology, New York University, jane.carlton@nyu.edu

**Online Resource 6** number and identity of sequences represented by each OTU clustered at 98%.

As clustering at 97% and 98% produced identical results, only 98% is included here.

| OTU number             | Sequences included                     |                                   |                                  |
|------------------------|----------------------------------------|-----------------------------------|----------------------------------|
| 1                      | Trichomonas_vaginalis_THAIS192         | Trichomonas_vaginalis_THAIS176    | Trichomonas_vaginalis_SD7        |
|                        | Trichomonas_vaginalis_SD1              | Trichomonas_vaginalis_SA-A71      | Trichomonas_vaginalis_SA-A19     |
|                        | Trichomonas_vaginalis_SA30             | Trichomonas_vaginalis_PMGH25      | Trichomonas_vaginalis_NYCF20     |
|                        | Trichomonas_vaginalis_NYCE32           | Trichomonas_vaginalis_NYCD15      | Trichomonas_vaginalis_NYCC37     |
|                        | Trichomonas_vaginalis_NYCB20           | Trichomonas_vaginalis_NYCA04      | Trichomonas_vaginalis-like_13255 |
|                        | Trichomonas_vaginalis-like_13240       | Trichomonas_vaginalis-like_13211  | Trichomonas_vaginalis-like_13207 |
|                        | Trichomonas_vaginalis-like_12857       | Trichomonas_vaginalis-like_12855  | Trichomonas_vaginalis-like_12850 |
|                        | Trichomonas_vaginalis-like_12847       | Trichomonas_vaginalis-like_12842  | Trichomonas_vaginalis-like_12840 |
|                        | Trichomonas_vaginalis-like_12839       | Trichomonas_vaginalis_GOR23       | Trichomonas_vaginalis_GOR21      |
|                        | Trichomonas_vaginalis_G3               | Trichomonas_vaginalis_CNDC217     | Trichomonas_vaginalis_CNDC188    |
|                        | Trichomonas_vaginalis_CDC252           | Trichomonas_vaginalis_C1:NIH      | Trichomonas_vaginalis_1080_      |
|                        | Trichomonas_vaginalis_1035             | Trichomonas_vaginalis_1031        | Trichomonas_tenax_Hs-4:NIH       |
|                        | Trichomonas_gallinae_TG                | Trichomonas_gallinae_SL           | Trichomonas_gallinae_DP3         |
|                        | Trichomonas_gallinae_AG                | Tetratrichomonas_gallinarum_TP-79 |                                  |
|                        | 2                                      | Rattus_sp.                        | Homo_sapiens                     |
| Canis_lupus_familiaris |                                        |                                   |                                  |
| 3                      | M54878_Giardia_intestinalis_Portland-1 | Giardia_intestinalis_Portland-1   |                                  |
| 4                      | Toxoplasma_gondii_RH                   |                                   |                                  |
| 5                      | Trichomitus_batrachorum_G43            |                                   |                                  |
| 6                      | Tetratrichomonas_gallinarum_Leverett   |                                   |                                  |
| 7                      | Blastocystis_hominis_BT1               |                                   |                                  |
| 8                      | AF149905_Entamoeba_invadens            |                                   |                                  |
| 9                      | Ditrichomonas_honigbergii_DR           |                                   |                                  |
| 10                     | Cryptosporidium_parvum_lowa            |                                   |                                  |
| 11                     | Saccharomyces_cerevisiae_SK1           |                                   |                                  |
| 12                     | Pentatrichomonas_hominis_Hs-3:NIH      |                                   |                                  |
| 13                     | U37461_Dientamoeba_fragilis_Bi/PA      |                                   |                                  |
| 14                     | Tritrichomonas_foetus_KV-1             |                                   |                                  |
| 15                     | Gallus_gallus                          |                                   |                                  |
| 16                     | Entamoeba_histolytica_HM-1:IMSS        |                                   |                                  |
| 17                     | Monotrichomonas_carabina_QBSA-1        |                                   |                                  |
| 18                     | Monocercomonas_colubrorum_W-578-73     |                                   |                                  |

**Online Resource 6** taxonomic assignment for the V4 Sanger sequences at 98%. As clustering at 97% and 98% produced identical results, only 98% is included here.

| OTU number | Number of sequences assigned | Source of OTU representative sequence       | Taxonomy assigned SILVA 111 db (evalue)                  | Taxonomy assigned curated db (evalue)    |
|------------|------------------------------|---------------------------------------------|----------------------------------------------------------|------------------------------------------|
| 1          | 41                           | <i>Trichomonas vaginalis</i> THAIS192       | <i>Trichomonas tenax</i> (2E-51)                         | <i>Trichomonas sp.</i> (2E-52)           |
| 2          | 4                            | <i>Rattus sp.</i>                           | <i>Mus musculus</i> (8E-70)                              | <i>Mus musculus</i> (7E-71)              |
| 3          | 2                            | <i>Giardia intestinalis</i> Portland-1      | <i>Giardia intestinalis</i> (3E-47)                      | <i>Giardia intestinalis</i> (2E-48)      |
| 4          | 1                            | <i>Toxoplasma gondii</i> RH                 | <i>Toxoplasma gondii</i> (1E-62)                         | <i>Toxoplasma gondii</i> (9E-64)         |
| 5          | 1                            | <i>Trichomitus batrachorum</i> G43          | <i>Trichomitus batrachorum</i> (1E-34)                   | <i>Trichomitus batrachorum</i> (8E-36)   |
| 6          | 1                            | <i>Tetratrichomonas gallinarum</i> Leverett | <i>Tetratrichomonas sp.</i> (5E-49)                      | <i>Tetratrichomonas sp.</i> (4E-50)      |
| 7          | 1                            | <i>Blastocystis hominis</i> BT1             | <i>Blastocystis sp.</i> (5E-68)                          | <i>Blastocystis sp.</i> (4E-69)          |
| 8          | 1                            | AF149905 <i>Entamoeba invadens</i>          | <i>Entamoeba suis</i> (1.00E-15)                         | <i>Entamoeba invadens</i> (1E-56)        |
| 9          | 1                            | <i>Ditrichomonas honigbergii</i> DR         | AB183887 <i>uncultured parabasalid eukaryote</i> (1E-40) | <i>Ditrichomonas honigbergii</i> (3E-51) |
| 10         | 1                            | <i>Cryptosporidium parvum</i> Iowa          | <i>Cryptosporidium wrairi</i> (3E-60)                    | <i>Cryptosporidium wrairi</i> (2E-61)    |
| 11         | 1                            | <i>Saccharomyces cerevisiae</i>             | <i>Saccharomyces cerevisiae</i> (8E-67)                  | <i>Saccharomyces cerevisiae</i> (7E-68)  |
| 12         | 1                            | <i>Pentatrichomonas hominis</i> Hs-3:NIH    | <i>Pentatrichomonas hominis</i> (3E-50)                  | <i>Pentatrichomonas hominis</i> (3E-51)  |
| 13         | 1                            | U37461 <i>Dientamoeba fragilis</i> Bi/PA    | <i>Dientamoeba fragilis</i> (7E-39)                      | <i>Dientamoeba fragilis</i> (6E-40)      |
| 14         | 1                            | <i>Tritrichomonas foetus</i> KV-1           | <i>Tritrichomonas suis</i> (3E-50)*                      | <i>Tritrichomonas suis</i> (3E-51)*      |
| 15         | 1                            | <i>Gallus gallus</i>                        | <i>Gallus gallus</i> (3E-69)                             | <i>Gallus gallus</i> (3E-70)             |
| 16         | 1                            | <i>Entamoeba histolytica</i> HM-1:IMSS      | No blast hit (None)                                      | <i>Entamoeba dispar</i> (4E-50)          |
| 17         | 1                            | <i>Monotrichomonas carabina</i> QBSA-1      | <i>Tritrichomonas suis</i> (2E-36)                       | <i>Monotrichomonas carabina</i> (4E-50)  |
| 18         | 1                            | <i>Monocercomonas colubrorum</i> W-578-73   | <i>Pseudotrichomonas keilini</i> (2E-29)                 | <i>Ditrichomonas honigbergii</i> (5E-31) |

\**Tritrichomonas foetus* and *Tritrichomonas suis* are considered the same species
